# Supplementary figures and images for: Electron transfer reactions of tris(polypyridine)cobalt(iii) complexes, [Co(N–N)3]3+, with verdazyl radicals in acetonitrile solution
Source: Royal Society of Chemistry journal article supplement (doi:10.1039/b412569j), 2004-11-17

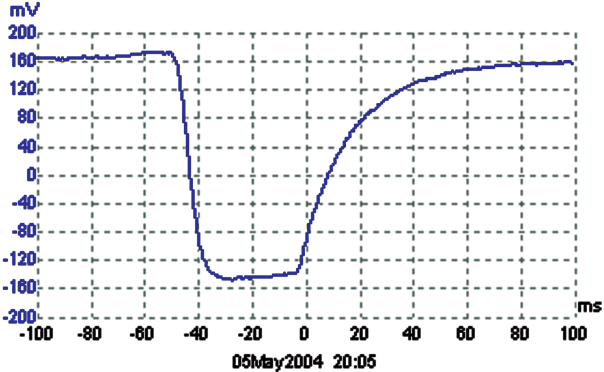

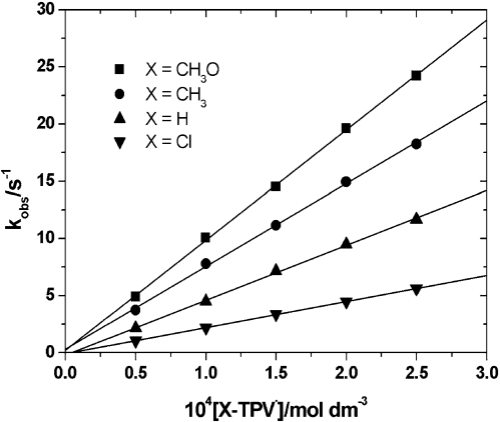

Supplement: b412569j.pdf [file b412569j.pdf]
